1                   **Transcriptomically-inferred PI3K activity and stemness show a**  
2                   **counterintuitive correlation with *PIK3CA* genotype in breast cancer**

3  
4 Ralitsa R. Madsen<sup>1,\*</sup>, Oscar M. Rueda<sup>3,4,5</sup>, Xavier Robin<sup>6</sup>, Carlos Caldas<sup>3,4,5</sup>, Robert K. Semple<sup>2,a</sup>,  
5 Bart Vanhaesebroeck<sup>1,a,\*</sup>

6  
7 <sup>1</sup>University College London Cancer Institute, Paul O’Gorman Building, University College London,  
8 London, UK.

9 <sup>2</sup>Centre for Cardiovascular Science, Queen’s Medical Research Institute, University of Edinburgh,  
10 Edinburgh, UK.

11 <sup>3</sup>Cancer Research UK Cambridge Institute and Department of Oncology, Li Ka Shing Centre,  
12 University of Cambridge, Cambridge, UK

13 <sup>4</sup>Cambridge Breast Unit, Addenbrooke’s Hospital, Cambridge University Hospital NHS Foundation  
14 Trust, Cambridge, UK

15 <sup>5</sup>NIHR Cambridge Biomedical Research Centre and Cambridge Experimental Cancer Medicine  
16 Centre, Cambridge University Hospital NHS Foundation Trust, Cambridge, UK

17 <sup>6</sup>SIB Swiss Institute of Bioinformatics, Biozentrum, University of Basel, Klingelbergstrasse 50–70,  
18 CH-4056 Basel, Switzerland

19  
20 <sup>a</sup>These authors contributed equally to this work.

21  
22 \*Corresponding authors: Ralitsa R. Madsen (R.R.M.), Bart Vanhaesebroeck (B.V.)

23  
24 **Email:** [r.madsen@ucl.ac.uk](mailto:r.madsen@ucl.ac.uk) (R.R.M.); [bart.vanh@ucl.ac.uk](mailto:bart.vanh@ucl.ac.uk) (B.V.)

25 0000-0001-8844-5167 (R.R.M.)

26 0000-0002-7074-3673 (B.V.)

27  
28 **Keywords**

29 PI3K, breast cancer, systems medicine, stemness, *PIK3CA*

30  
31 **Author Contributions**

32 Overall conceptualisation and study design by R.R.M., under supervision from B.V. and R.K.S. O.R.  
33 and X.R. reviewed the bioinformatic code. R.R.M. wrote the manuscript, with input from B.V. and  
34 R.K.S. All authors reviewed and edited the final version.

35  
36 **This PDF file includes:**

37 Main Text

38 Figure 1

39 Figure 2

40 Figure 3

41 Figure 4

42 Figure 5

46 **ABSTRACT**

47

48 A PI3K $\alpha$ -selective inhibitor has recently been approved for use in breast tumours harbouring mutations in  
49 *PIK3CA*, the gene encoding PI3K $\alpha$ . Preclinical studies have suggested that the PI3K/AKT/mTORC1 signalling  
50 pathway influences stemness, a dedifferentiation-related cellular phenotype associated with aggressive cancer.  
51 No direct evidence for such a correlation has been demonstrated to date in human tumours. In two independent  
52 human breast cancer cohorts, encompassing nearly 3,000 tumour samples, transcriptional footprint-based  
53 analysis uncovered a positive linear association between transcriptionally-inferred PI3K signalling scores and  
54 stemness scores. Unexpectedly, stratification of tumours according to *PIK3CA* genotype revealed a “biphasic”  
55 relationship of mutant *PIK3CA* allele dosage with these scores. Relative to tumour samples without *PIK3CA*  
56 mutations, the presence of a single copy of a hotspot *PIK3CA* variant was associated with lower PI3K signalling  
57 and stemness scores, whereas tumours with multiple copies of *PIK3CA* hotspot mutations showed higher PI3K  
58 signalling and stemness scores. This observation was recapitulated in a human cell model of heterozygous and  
59 homozygous *PIK3CA*<sup>H1047R</sup> expression. Collectively, our analysis provides evidence for a signalling strength-  
60 dependent PI3K-stemness relationship in human breast cancer, which may aid future patient stratification for  
61 PI3K-targeted therapies.

62

## 63 INTRODUCTION

64

65 Activating mutations in *PIK3CA* are among the most common somatic point mutations in cancer, together  
66 with inactivation or loss of the tumour suppressor PTEN, a negative regulator of class I phosphoinositide 3-kinase  
67 (PI3K) enzymes [1–3]. PI3K $\alpha$ -selective inhibitors are now making good progress in the clinic [4], with the PI3K $\alpha$ -  
68 specific inhibitor alpelisib (Piqray/NVP-BYL719; Novartis) received approval for the treatment of advanced  
69 hormone-receptor (HR)-positive, HER2-negative breast cancers, following a randomised phase III trial  
70 evaluating alpelisib with the oestrogen receptor (ER) antagonist fulvestrant *versus* fulvestrant alone [5]. The trial  
71 concluded that a clinically-relevant benefit of the combination therapy was more likely in patients with *PIK3CA*-  
72 mutant tumours [5]. The FDA approval of alpelisib was accompanied by approval of the companion diagnostic  
73 theascreen® *PIK3CA* test (QIAGEN) which detects 11 *PIK3CA* hotspot mutations. Despite these advances,  
74 a substantial proportion of patients with *PIK3CA*-mutant tumours failed to improve on the combination therapy  
75 [5], highlighting the need for further refinement of current patient stratification strategies.

76 Experimental evidence suggests that heterozygous expression of a strongly activating *PIK3CA* mutation  
77 alone is insufficient to transform cells *in vitro* or to induce tumourigenesis *in vivo* (reviewed in Ref. [6]). This is  
78 supported by observations of people with disorders in the *PIK3CA*-related overgrowth spectrum (PROS) which  
79 is caused by the same spectrum of *PIK3CA* mutations found in cancer, but does not feature discernible excess  
80 risk of adult malignancy [6]. It thus appears that additional events are required for cell transformation, possibly  
81 in the PI3K pathway itself. In this regard, we and others have recently shown that many *PIK3CA*-associated  
82 cancers harbour multiple independent mutations activating the PI3K pathway, including multiple *PIK3CA*  
83 mutations in *cis* or *trans* [3,7–10].

84 Overexpression of wild-type *Pik3ca* or the hotspot *Pik3ca*<sup>H1047R</sup> mutation has been linked to  
85 dedifferentiation and stemness in murine models of cancer [11–17], particularly of the breast, but *Pik3ca* gene  
86 dose-dependent regulation has not been addressed. Pluripotent stem cells (PSCs) share key characteristics  
87 with cancer cells, including developmental plasticity, the capacity for indefinite self-renewal, rapid proliferation  
88 and high glycolytic flux [18]. We recently reported that human PSCs with two endogenous alleles of the strongly  
89 activating cancer hotspot mutation *PIK3CA*<sup>H1047R</sup> exhibit pronounced phenotypic differences compared to  
90 isogenic cells heterozygous for the same *PIK3CA* variant [8]. These differences include partial loss of epithelial  
91 morphology, widespread transcriptional reprogramming and self-sustained stemness *in vitro* and *in vivo* [8],  
92 none of which were observed in heterozygous *PIK3CA*<sup>H1047R</sup> cells. Collectively these findings emphasise the  
93 importance of *PIK3CA* mutation dose, and its inferred functional correlate, PI3K signalling strength, in  
94 determining the cellular consequences of mutational activation of this pathway.

95 Stemness or dedifferentiation, accompanied by re-expression of embryonic genes, is a feature of  
96 aggressive tumours [19,20]. Beyond direct histopathological analyses, this has been supported by  
97 computational analyses examining a tumour's expression of defined PSC gene signatures [19–22]. With the  
98 continuing collection and curation of multi-omics datasets by the cancer community, such signatures can now  
99 be employed *en masse* to study how cancer-specific stemness relates to other biological processes of interest.  
100 This can, however, be challenging for highly dynamic processes such as signalling pathway activity which is  
101 best inferred using temporal protein-based measurements. Such measurements are not available for most  
102 human tissue samples. A complementary approach is the use of transcriptional “footprints” of pathway  
103 activation, derived from the systematic curation of gene expression data obtained from direct perturbation  
104 experiments [23–25]. Given the slower time scale of gene expression regulation relative to acute signalling  
105 changes at the protein level, transcriptional footprint analyses can be thought of as providing an integrated  
106 measure of pathway activity over a longer time scale. The power of such analyses has been best demonstrated  
107 by The Connectivity Map Resource, which enables the discoveries of gene and drug mechanisms of action on  
108 the basis of common gene-expression signatures [26,27].

109 Here, we set out to determine whether a signalling strength-dependent PI3K-stemness link exists in  
110 human breast cancer, and to provide a systematic characterisation of relevant clinical and biological correlates.  
111 We used established, open-source methods to infer PI3K signalling activity and stemness scores from publicly  
112 available transcriptomic data from nearly 3,000 primary human breast tumours. Our analyses reveal a positive,  
113 linear relationship between PI3K signalling and stemness scores, and uncover a surprising and unanticipated  
114 ‘biphasic’ relationship between these scores and mutant *PIK3CA* allele dosage. This suggests a potential utility  
115 for combined functional genomics and genotype assessments in future patient stratification for PI3K-targeted  
116 therapy. Consistent with prior cell biology studies, breast tumour transcriptomic analyses revealed strong  
117 clustering of PI3K and stemness scores with MYC-related biological processes, including proliferation and

118 glycolysis. With the advent of routine tumour gene expression analyses, further dissection of the mechanisms  
119 driving these associations may enable much-needed further therapeutic advances.

120

## 121 RESULTS

122

### 123 **Transcriptional indices of PI3K pathway activity in breast cancer are positively associated with** 124 **stemness and tumour grade**

125

126 The molecular features of stemness can be captured by gene signatures derived by computational  
127 comparisons of pluripotent stem cells and differentiated derivatives. Among the first such signatures was  
128 PluriNet ( $n = 299$  genes; **Supplementary Table 1**), generated with machine learning methods [28], and applied  
129 below to primary breast cancer samples. To evaluate PI3K pathway activity in the same samples, we used the  
130 “HALLMARK\_PI3K\_AKT\_MTOR\_SIGNALING” gene set from the Broad Institute Molecular Signature  
131 Database (MSigDB). This gene set consists of 105 genes upregulated upon PI3K pathway activation across  
132 multiple studies [24] (**Supplementary Table 2**), thus corresponding to a gene expression footprint of PI3K  
133 pathway activation. Of note, only 4 genes were shared between the PI3K activity and stemness gene lists,  
134 precluding a direct confounding effect on the relationship between stemness and PI3K activity scores tested  
135 here.

136 We used Gene Set Variation Analysis (GSVA) [29], an open-source method, to calculate stemness and  
137 PI3K activity scores on the basis of the aforementioned gene expression signatures, independently in breast  
138 cancer tumours with available transcriptomic data from the METABRIC ( $n = 1980$ ; used for primary analyses)  
139 and TCGA patient cohorts ( $n = 928$ ; used for secondary analyses). The PI3K activity score in METABRIC  
140 breast tumours correlated significantly with the stemness score (**Fig. 1A**; Spearman's Rho = 0.49,  $p < 2.2e-16$ )  
141 as well as tumour grade status (**Fig. 1B**), a measure of tumour dedifferentiation based on histopathological  
142 assessment. A similar linear relationship between PI3K activity and stemness scores was also found in TCGA  
143 breast cancers (**Fig. 1C**; Spearman's Rho = 0.42;  $p < 2.2e-16$ ).

144 To ascertain the ability of our approach to capture *bona fide* features of stemness and PI3K signalling from  
145 transcriptomic data, we next performed pairwise-correlations with independently-derived transcriptomic indices  
146 for each phenotype. Across both METABRIC (**Fig. 1D**) and TCGA (**Fig. 1E**) breast tumours, the PluriNet-  
147 derived stemness score showed good concordance with alternative stemness scores obtained using Malta *et al.*'s  
148 one-class logistic regression (OCLR)-based signature [21], or the signature from Miranda *et al.* [22], a  
149 modified version of a gene set initially developed by Palmer *et al.* [20]. The strongest correlations (Spearman's  
150 Rho  $> 0.7$ ) were between PluriNet and the OCLR-based signature, both of which were derived using distinct  
151 machine learning algorithms.

152 To strengthen our observations, we next applied PROGENY to obtain an independent measure of PI3K  
153 activity on the basis of the transcriptomic footprint. Instead of the enrichment score calculated by GSVA,  
154 PROGENY uses a linear model to infer pathway activity from the expression of 100 pathway-responsive genes  
155 [23]. The GSVA- and PROGENY-derived PI3K scores exhibited a significant positive correlation (Spearman's  
156 Rho  $> 0.5$ ) across both METABRIC and TCGA breast cancers (**Fig. 1D, 1E**). Consistently, the two PI3K activity  
157 scores also exhibited similar positive correlations with all three stemness indices (**Fig. 1D, 1E**).

158 Taken together, these results provide evidence for the existence of a positive relationship between  
159 stemness and overall PI3K activity in human breast cancer.

160

### 161 **Stemness and PI3K activity scores differ across breast cancer tumour subtypes**

162

163 Using our GSVA-based stemness and PI3K activity scores, we next sought to determine their relationship  
164 with clinical breast cancer subtype. Upon stratification of METABRIC breast cancers into those with “high” and  
165 “low” PI3K activity scores, we found that around 45% of tumours with a high PI3K activity score were ER-  
166 negative, in contrast to 4% of tumours with low PI3K activity scores (**Fig. 2A**). In TCGA, the corresponding  
167 percentages were 33% and 7% (**Fig. S1A**). Consistently, PI3K activity and stemness scores were highest in  
168 the more aggressive PAM50 breast cancer subtypes (**Fig. 2B**), including Basal, HER2 and Luminal B. These  
169 findings are in line with independent studies relying on alternative indices and methods for quantifying PI3K  
170 signalling and stemness in separate analyses [19,21,30–32]. Importantly, the correlation of a high PI3K activity  
171 score with ER-negativity contrasts with the known enrichment of *PIK3CA* mutations in ER-positive breast  
172 tumours [32,33], which were also reproduced by our analyses (**Fig. 2C, Fig. 2D**).

173

## 174 **PI3K and stemness scores, but not binary *PIK3CA* mutant status, predict prognosis in breast cancer**

175

176

177

178

179

180

181

182

183

184

185

186

As expected, given the positive association between PI3K and stemness scores with tumour grade, both scores were negatively associated with patient survival in the METABRIC cohort, with a clear dosage relationship between the assessed scores and survival, including progressively worsened survival in tumours with high vs intermediate vs low scores (**Fig. 3A, 3B**). This relationship was not simply driven by the above-mentioned enrichment of high PI3K and stemness scores in more aggressive ER-negative tumours, as the prognostic power of both scores remained when evaluated in ER-positive tumours only (**Fig. 3C, 3D**). In contrast, although overall ER-negative cases with available survival data were limited in number, we in fact noticed a loss of prognostic power when evaluating the two scores in this breast cancer subset (**Fig. S1B, S1C**). Due to limited data, extensive survival analyses were not possible in TCGA breast cancers, however the negative association between PI3K activity “strength” and pan-breast cancer survival was reproduced (**Fig. S1D**).

187

188

189

190

191

As previously reported [33–35], activating *PIK3CA* mutations had no prognostic power in pan-breast or ER-positive METABRIC tumours, despite their enrichment in the ER-positive cohort (**Fig. 3E, 3F**). Interestingly, however, the presence of *PIK3CA* mutations in ER-negative tumours appeared to be associated with worse prognosis (**Fig. S1E**).

192

193

194

## 192 **Stratification of breast cancers by mutant *PIK3CA* allele dosage reveals a biphasic relationship with PI3K activity and stemness scores**

195

196

197

198

199

200

201

Given the divergent correlations between PI3K signalling scores and *PIK3CA* mutant status in the survival analyses, we next assessed the relationship between stemness/PI3K signalling scores and *PIK3CA* genotype, taking into account available information on mutant *PIK3CA* allele dosage on the basis of our previous work with TCGA tumours [8]. For METABRIC, we inferred *PIK3CA* copy number changes based on available information on allele gain/amplification in cBioPortal. For both cohorts, we specifically focused on tumours harbouring one or more hotspot *PIK3CA* alleles, given the well-established increased cellular activity of these mutants and their association with disease severity [36–39].

202

203

204

205

206

207

208

209

210

As PI3K pathway activation and tumour dedifferentiation can be triggered by a range of oncogenic hits, the relatively high PI3K and stemness scores in *PIK3CA*-WT breast cancers was not entirely surprising (**Fig. 4A, 4B**). It was, however, counterintuitive that the presence of a single oncogenic *PIK3CA* missense variant was associated with a substantial reduction in the stemness score and only a modest reduction in the PI3K score (**Fig. 4A, 4B**). Relative to tumours with a single *PIK3CA* mutant copy, those with multiple oncogenic *PIK3CA* copies exhibited higher PI3K and stemness scores (**Fig. 4A, 4B**). This relationship was lost upon simple binary classification based on *PIK3CA* genotypes (i.e. wild-type vs mutant) (**Fig. 4A, 4B**). The observed biphasic relationship also remained upon stratification of tumours according to genome doubling (data only available for TCGA samples; **Fig. 4C**).

211

212

213

214

215

216

217

218

219

220

221

222

223

224

225

226

Surprised by this observation, we next asked whether the biphasic relationship between *PIK3CA* genotype and transcriptionally-derived PI3K/stemness scores could be recapitulated in a controlled cellular model. We turned to human induced pluripotent stem cells (iPSCs) that we engineered previously to harbour heterozygous or homozygous *PIK3CA*<sup>H1047R</sup> alleles, the only reported cellular models of heterozygous and homozygous *PIK3CA*<sup>H1047R</sup> expression on an isogenic background to date [40]. Using our previously reported high-depth transcriptomic data on *PIK3CA*<sup>WT/H1047R</sup> and *PIK3CA*<sup>H1047R/H1047R</sup> iPSCs [40], we performed conventional gene set enrichment analysis (GSEA) with the two gene set signatures used for PI3K and stemness score calculations in the breast cancer setting (MSigDB “HALLMARK\_PI3K\_AKT\_MTOR\_SIGNALING” and PluriNet, respectively). In line with their established biochemical and cellular phenotypes [8,40], homozygous *PIK3CA*<sup>H1047R</sup> iPSCs showed strong positive enrichment for both PI3K and stemness gene signatures (**Fig. 4D**). In contrast, their heterozygous *PIK3CA*<sup>H1047R</sup> counterparts presented with a strong negative enrichment for stemness, and no significant enrichment for the transcriptional PI3K signature (**Fig. 4D**). These patterns mirror those observed in human breast cancers and corroborate the existence of a previously unappreciated biphasic relationship between *PIK3CA* allele dosage and stemness.

## 227 **Stemness and PI3K activity scores are positively associated with proliferative and metabolic** 228 **processes**

229

230 Given the high depth and large sample size of the available breast cancer transcriptomic data, we next  
231 undertook a global analysis encompassing all 50 “hallmark” MSigDB gene sets and the PluriNet signature to  
232 identify relevant biological processes associated with breast cancer stemness and a high PI3K activity score.  
233 Such processes can be used to guide future experimental studies aimed at dissecting the molecular  
234 underpinnings of the observed relationships. To identify such associations, we applied GSVA to METABRIC  
235 and TCGA data to generate a score for each gene signature, followed by correlation analysis with hierarchical  
236 clustering. This global approach also allowed us to confirm that we are able to identify biologically-relevant gene  
237 signature clusters more broadly. For example, gene signatures associated with inflammatory processes  
238 clustered according to strong pairwise positive correlations in both METABRIC and TCGA datasets  
239 (**Fig. 5A bottom cluster, Fig. 5B top left cluster**).

240 Data from either cohort revealed a characteristic clustering pattern for PI3K and stemness scores,  
241 including strong positive associations with proliferative (e.g., “G2M\_checkpoint”, “E2F\_targets”, “MYC\_targets”)  
242 and metabolic (e.g., “Glycolysis”, “Oxidative\_phosphorylation”, “Reactive\_oxygen\_species”) gene signatures  
243 (**Fig. 5A, Fig. 5B**). These signatures shared few genes (**Fig. S1F**), ruling out technical artefacts as a source of  
244 the positive associations. Notably, the separate mTORC1 gene signature exhibited a much stronger correlation  
245 (Spearman’s  $\rho = 0.7$ ) with the stemness score compared with the PI3K\_AKT\_mTOR signature used to derive  
246 the PI3K activity score. Given a similarly high correlation between the PI3K\_AKT\_mTOR and mTORC1  
247 signature scores (Spearman’s  $\rho = 0.7$ ), these data suggest that the observed relationship between PI3K and  
248 stemness in breast cancer may be driven by mTORC1-dependent processes.

249

## 250 **DISCUSSION**

251 This study provides a comprehensive analysis of the relationship between PI3K signalling and stemness (or  
252 tumour dedifferentiation) using two large breast cancer transcriptomic datasets encompassing almost 3,000  
253 primary tumours. We demonstrate a strong, positive relationship between transcriptionally-inferred PI3K  
254 pathway activity, stemness gene expression and histopathological tumour dedifferentiation. Importantly, we  
255 show that stratification of breast tumours according to single vs multiple copies of *PIK3CA* hotspot mutations  
256 results in distinct and near-opposite distributions with respect to PI3K signalling and stemness scores, an  
257 observation that is recapitulated in a controlled cell model system.

258 The PI3K $\alpha$ -specific inhibitor alpelisib (Piqray/NVP-BYL719; Novartis) recently received approval for use in  
259 combination with the ER-antagonist fulvestrant in the treatment of ER-positive breast cancers. The benefit of  
260 this treatment was most notable in *PIK3CA*-mutant tumours, yet the predictive value of binary mutant  
261 classification was incomplete [5]. This is a common observation for single gene biomarkers in cancer and has  
262 long spurred discussions about the utility of phenotypic pathway signatures for clinical response prediction [41].  
263 It is therefore interesting to note that while *PIK3CA* mutations are enriched in the ER-positive breast cancer  
264 subgroup, on average these tumours also feature lower PI3K signalling and stemness scores as inferred from  
265 our transcriptional footprint analyses. The opposite is true for ER-negative tumours. Given that the MSigDB  
266 hallmark PI3K\_AKT\_mTOR signature used in our study also encompasses mTORC1-related processes, in  
267 line with a strong correlation with the separate hallmark mTORC1 signature, our findings support a previous  
268 study reporting a negative relationship between the presence of a *PIK3CA* mutation and mTORC1 signalling  
269 in ER-positive/HER2-negative breast cancers [35]. As we show, however, simple binary classification of  
270 tumours into *PIK3CA* wild-type and mutant genotypes, without allele dosage considerations, is likely to have  
271 masked a more complex biological relationship. On the other hand, our study does not distinguish between  
272 AKT- and mTORC1-specific processes, which may nevertheless be important to consider for further  
273 mechanistic understanding and patient stratification [35,42,43].

274 Disentangling the apparent biphasic relationship between single *versus* multiple copies of *PIK3CA*  
275 mutation and stemness scores will require direct experimentation, but is likely to reflect context-dependent  
276 feedback loops within the intracellular signalling networks. Such feedback loops can result in non-intuitive and  
277 discontinuous outcomes upon different levels of activation of the same pathway, as demonstrated in our  
278 isogenic iPSC system with heterozygous and homozygous *PIK3CA*<sup>H1047R</sup> expression [8,40]. In general, our  
279 observations caution against the use of a binary *PIK3CA*-mutant-centric approach to predict PI3K pathway  
280 activity outcomes. Moreover, we note that numerous alternative genetic changes – including *PIK3CA*  
281 amplification, loss of *PTEN* or *INPP4B* – may converge on increased, and perhaps dose-dependent, PI3K

282 pathway activation [3,30,32,44]. Importantly, such *PIK3CA* mutant-independent pathway activation is captured  
283 by the transcriptional footprint-based PI3K activity scores used in our study and will thus contribute to the values  
284 observed in non-*PIK3CA* mutant tumours.

285 While PI3K and stemness scores exhibit a strength-dependent negative association with patient survival  
286 pan-breast cancer as well as in ER-positive tumours, this prognostic power is not observed with binary  
287 genotype-based *PIK3CA* classification. Paradoxically, however, *PIK3CA* mutations have prognostic power in  
288 ER-negative tumours, in contrast to PI3K signalling and stemness scores. This raises the question whether  
289 subgroups defined by differences in *PIK3CA* mutant status and PI3K signalling/stemness scores differ in their  
290 response to PI3K $\alpha$ -targeted therapy.

291 It is also notable that our correlation analyses of breast cancer transcriptomes identified a PI3K/stemness  
292 cluster encompassing key processes associated with the MYC regulatory module in pluripotent stem cells [45];  
293 a module previously shown to be active in various cancers and predictive of cancer outcome [46]. Moreover,  
294 computational analyses of iPSCs with homozygous *PIK3CA*<sup>H1047R</sup> expression identified MYC as a central hub  
295 connecting the PI3K, TGF $\beta$  and pluripotency networks in these cells [40]. Recently, *PIK3CA*<sup>H1047R</sup>/*KRAS*<sup>G12V</sup>  
296 double knock-in breast epithelial cells were also shown to exhibit a high MYC transcriptional signature, when  
297 compared to single-mutant counterparts [47]. Collectively, the recurrent appearance of MYC in these  
298 independent analyses raises the possibility that this transcription factor governs the mechanistic link between  
299 stemness and PI3K signalling strength in pluripotent stem cells and breast cancer. Experimental studies will be  
300 required to test this hypothesis, alongside a potential involvement of mTORC1 as suggested by the observed  
301 strong positive correlation between the mTORC1 signature and stemness/MYC signatures.

302 A limitation of the current and previous bulk-tissue transcriptomic analyses is that they cannot determine  
303 (1) whether the observed correlations reflect mechanistic links or spurious associations caused by a confounder  
304 variable that influences two or more processes independently and (2) to what extent the observed  
305 transcriptomic scores are driven by changes in the subcellular composition, tumour cell type-specific phenotypic  
306 alterations, and/or non-cell-autonomous interactions with the stroma. Nevertheless, given our ability to  
307 reproduce key observations in a controlled cell model system, our analyses of the relationship between PI3K  
308 signalling dose and stemness in breast cancer may prove useful in guiding future experimental studies aimed  
309 at identifying the exact molecular underpinnings. Since we know that heterozygous *PIK3CA*<sup>H1047R</sup> iPSCs exhibit  
310 moderate PI3K pathway activation at the biochemical level [8,40], the fact that this is not captured in a positive  
311 transcriptional footprint-based PI3K score is worth noting. Combined with the observation of an apparent  
312 decrease in the PI3K score in tumours with a single copy of a hotspot *PIK3CA* mutation, we surmise that this  
313 may reflect feedback mechanisms that limit the influence of intermediate PI3K pathway activation but that are  
314 not sufficient in the face of stronger activity. This warrants further studies as it may have important consequences  
315 for targeting of tumours with a high *versus* low transcriptionally-inferred PI3K score. It is also worth noting that  
316 previous protein-based signalling studies of breast cancer cell lines and tumours with and without *PIK3CA*  
317 mutations found that *PIK3CA* mutations were associated with lower and/or inconsistent PI3K pathway  
318 activation [30,33,35].

319 Finally, on the basis of the presented analyses, it will be of interest to evaluate the predictive power of a  
320 combined assessment of *PIK3CA* genotype and phenotypic PI3K/stemness scores in patient stratification for  
321 clinical trials with PI3K pathway inhibitors and, given the well-established implication of PI3K signalling in  
322 therapeutic response and resistance, with other cancer therapies.

## 323 MATERIALS AND METHODS

324

### 325 Data and materials availability

326

327 All computational analyses were conducted in R [48]. The below represent summaries of the applied  
328 methods. Detailed step-by-step workflows on each breast cancer cohort, can be found on the  
329 accompanying Open Science Framework (OSF) page: <https://osf.io/g8rf3/wiki/home/>. This also  
330 contains all source datasets and key output data tables as well as figure. As indicated in the  
331 accompanying scripts, all relevant packages were sourced either from CRAN or Bioconductor (via  
332 BiocManager [49]). Figures were produced using the *ggplot2* package [50].

333 Further information requests should be directed to and will be fulfilled by the corresponding authors, Ralitsa  
334 R. Madsen ([r.madsen@ucl.ac.uk](mailto:r.madsen@ucl.ac.uk)) and Bart Vanhaesebroeck ([bart.vanh@ucl.ac.uk](mailto:bart.vanh@ucl.ac.uk)).

335

### 336 METABRIC and TCGA data access and pre-processing

337

338 Normalised microarray-based gene expression for METABRIC breast tumour samples were obtained  
339 from Curtis et al. [51], and clinical data from Rueda et al. [52]. The relevant METABRIC mutation data were  
340 downloaded from cBioPortal in January (mutation-only) and March (mutation and copy number) 2020 [53].  
341 TCGA breast invasive carcinoma (BRCA) RNAseq, mutational and clinical data were retrieved from the GDC  
342 server (legacy database) using the *TCGAbiolinks* package [54], with additional mutation data retrieved from  
343 cBioPortal in January 2021 (for exact details, see the OSF-deposited RNotebooks). The *TCGAbiolinks*  
344 package was also used for subsequent quantile filtering (quantile value = 0.4) of lowly-expressed gene and  
345 removal of tumour samples with low purity (cpe = 0.6). The resulting raw RSEM counts were normalised with  
346 the TMM method [55] and log<sub>2</sub>-transformed using the *voom()* function in the *limma* package prior to  
347 downstream use in GSVA computations. The TCGA BRCA mutation data with available copy number  
348 estimates for individual mutations were obtained from Madsen et al. [8] and merged with the mutation data from  
349 cBioPortal. Multiple allele copies were defined as those having  $\text{mut.multi} \geq 1.5$ .

350 To analyse the relationships between *PIK3CA* genotype and PI3K/stemness scores, *PIK3CA* mutant  
351 datasets were subset for focus on hotspot *PIK3CA* variants only (C420R, E542K, E545K, H1047L, H1047R),  
352 excluding samples containing both a hotspot and a non-hotspot variant. The classification of hotspot vs non-  
353 hotspot variants was based on known clinical significance and frequency in patients with overgrowth caused by  
354 a single activating *PIK3CA* mutations [38]. Mutation data underwent manual checks to exclude samples with  
355 ambiguous genotype calls as well as all silent mutations.

356

### 357 Calculation of transcription-based signature scores

358

359 The “HALLMARK\_PI3K\_AKT\_MTOR\_SIGNALING” and PluriNet gene sets were retrieved from The  
360 Molecular Signature Database (MSigDb) using the *msigdb* package [56]. Note that the  
361 “HALLMARK\_PI3K\_AKT\_MTOR\_SIGNALING” gene set also includes mTORC1-dependent gene  
362 expression changes, in contrast to other studies which have sought to separate AKT- and mTORC1-driven  
363 gene expression changes [42,43]. Categorisation of scores into “low”, “intermediate” and “high” was based on  
364 the 0.25 quantile, the interquartile range, and the 0.75 quantile, respectively. The stemness signature used by  
365 Miranda *et al.* [22] was retrieved from the accompanying supplementary material. Individual scores for each of  
366 these signatures were computed with the *GSVA* package, using the default Gaussian kernel and ESdiff  
367 enrichment values as output [29].

368 The PROGENy package was used to obtain a PI3K score according to a linear model based on pathway-  
369 responsive genes as described in Ref. [23].

370 The *TCGAnalyze\_Stemness()* function in *TCGAbiolinks* was used to calculate a stemness score  
371 according to the machine learning model-based mRNAsi signature reported by Malta *et al.* [21].

372 Transcriptomic data for human induced pluripotent stem cells with wild-type *PIK3CA* or  
373 heterozygous/homozygous *PIK3CA*<sup>H1047R</sup> were available from Ref. [40]. Fast gene set enrichment analysis  
374 (fgsea) [57] with the “HALLMARK\_PI3K\_AKT\_MTOR\_SIGNALING” and “PluriNet” gene sets were performed  
375 using the *t* statistic for all genes from comparisons between *PIK3CA*<sup>WT/H1047R</sup> (heterozygous) vs wild-type and  
376 *PIK3CA*<sup>H1047R/H1047R</sup> vs wild-type samples. Multiple comparison adjustment were performed using the intrinsic



377 *fgsea()* function settings (FDR = 0.05), except that nominal p-values were calculated from 100,000 permutations  
378 for increased stringency.

379

## 380 **Statistical analyses**

381

382 Linear models were used to assess the significance of the relationship between stemness and PI3K  
383 scores in both METABRIC and TCGA breast cancer cohorts. One-way ANOVA followed by Tukey's Honest  
384 Significant Differences (HSD) method was used to perform pairwise significance testing with multiple  
385 comparison adjustments (adjusted p-value < 0.05) when evaluating grade- and cancer subtype-specific  
386 differences in PI3K/stemness scores across the METABRIC cohort; similar analyses were not performed with  
387 the TCGA breast cancer data due to smaller sample size and incomplete grading information. ANOVA with  
388 Tukey's HSD was also used to evaluate the significance of the relationships between *PIK3CA* genotype and  
389 PI3K/stemness scores across both cohorts. For linear models as well as ANOVAs, the residuals were  
390 examined to confirm that model assumptions were met. The only assumption that was violated was that of  
391 normality; however, given the large sample size, this violation is expected to have a minimal impact on model  
392 validity [58].

393 Differences in categorical PI3K/stemness score ("low", "intermediate", "high") distributions across tumour  
394 subtypes and/or genotypes were assessed using a Chi-squared goodness-of-fit test. The relationship between  
395 PI3K/scores and survival was assessed using a non-parametric log-rank test.

396 Pairwise correlation analyses and hierarchical clustering of signature scores were performed using  
397 Spearman's rank correlation and the Ward.D2 method (available through R package *corrplot*;  
398 <https://github.com/taiyun/corrplot>). The associated p-values were adjusted for multiple comparisons using the  
399 Bonferroni method (family-wise error rate < 0.05).

## 400 **Funding**

401

402 R.R.M. is supported by a Sir Henry Wellcome Fellowship (220464/Z/20/Z). Work in the laboratory of B.V.  
403 is supported by Cancer Research UK (C23338, A25722) and PTEN Research. R.K.S. is supported by the  
404 Wellcome Trust (105371/Z/14/Z, 210752/Z/18/Z). O.M.R. and C.C. are supported by Cancer Research UK.

405

## 406 **Acknowledgements**

407

408 We are grateful to Dr Neil Vasan (Memorial Sloan Kettering Cancer Center, New York) for excellent  
409 feedback on the manuscript. We would also like to thank the cancer community behind the TCGA/METABRIC  
410 datasets, as well as data scientists developing the above-mentioned analysis tools, for making them publicly  
411 available and thus enabling the completion of this study.

412

## 413 **Competing interests**

414

415 R.K.S. is a consultant for HotSpot Therapeutics (Boston, MA, USA); B.V. is a consultant for iOnctura  
416 (Geneva, Switzerland), Venthera (Palo Alto, CA, USA) and Olema Pharmaceuticals (San Francisco, US), and  
417 has received speaker fees from Gilead Sciences (Foster City, US).

418 **References**

- 419
- 420 1 Chang, M. T. et al. (2015) Identifying recurrent mutations in cancer reveals widespread  
421 lineage diversity and mutational specificity. *Nat. Biotechnol.* **34**, 155–163.
- 422 2 Campbell, P. J. et al. (2020) Pan-cancer analysis of whole genomes. *Nature* **578**, 82–93.
- 423 3 Sanchez-Vega, F. et al. (2018) Oncogenic Signaling Pathways in The Cancer Genome  
424 Atlas. *Cell* **173**, 321–337.e10.
- 425 4 Vanhaesebroeck, B. et al. (2021) PI3K inhibitors are finally coming of age. *Nat. Rev. Drug*  
426 *Discov.*
- 427 5 André, F. et al. (2019) Alpelisib for PIK3CA-mutated, hormone receptor-positive advanced  
428 breast cancer. *N. Engl. J. Med.* **380**, 1929–1940.
- 429 6 Madsen, R. R. et al. (2018) Cancer-Associated PIK3CA Mutations in Overgrowth  
430 Disorders. *Trends Mol. Med.* **24**, 856–870.
- 431 7 Yuan, T. L. and Cantley, L. C. (2008) PI3K pathway alterations in cancer: variations on a  
432 theme. *Oncogene* **27**, 5497–5510.
- 433 8 Madsen, R. R. et al. (2019) Oncogenic PIK3CA promotes cellular stemness in an allele  
434 dose-dependent manner. *Proc. Natl. Acad. Sci.* **116**, 8380–8389.
- 435 9 Vasan, N. et al. (2019) Double PIK3CA mutations in cis increase oncogenicity and  
436 sensitivity to PI3K $\alpha$  inhibitors. *Science*. **366**, 714–723.
- 437 10 Saito, Y. et al. (2020) Landscape and function of multiple mutations within individual  
438 oncogenes. *Nature* **582**, 95–99.
- 439 11 Van Keymeulen, A. et al. (2015) Reactivation of multipotency by oncogenic PIK3CA  
440 induces breast tumour heterogeneity. *Nature* **525**, 119–23.
- 441 12 Koren, S. et al. (2015) PIK3CA(H1047R) induces multipotency and multi-lineage  
442 mammary tumours. *Nature* **525**, 114–8.
- 443 13 Hanker, A. B. et al. (2013) Mutant PIK3CA accelerates HER2-driven transgenic mammary  
444 tumors and induces resistance to combinations of anti-HER2 therapies. *Proc. Natl. Acad.*  
445 *Sci. U. S. A.* **110**, 14372–14377.
- 446 14 van Veen, J. E. et al. (2019) Mutationally-activated PI3'-kinase- $\alpha$  promotes de-  
447 differentiation of lung tumors initiated by the BRAFV600E oncoprotein kinase. *Elife* **8**, 1–  
448 33.
- 449 15 Riemer, P. et al. (2017) Oncogenic  $\beta$ -catenin and PIK3CA instruct network states and  
450 cancer phenotypes in intestinal organoids. *J. Cell Biol.* **216**, 1567–1577.
- 451 16 Du, L. et al. (2016) Overexpression of PIK3CA in murine head and neck epithelium drives  
452 tumor invasion and metastasis through PDK1 and enhanced TGF $\beta$  signaling. *Oncogene*  
453 **35**, 4641–4652.
- 454 17 Meyer, D. S. et al. (2011) Luminal expression of PIK3CA mutant H1047R in the mammary  
455 gland induces heterogeneous tumors. *Cancer Res.* **71**, 4344–4351.
- 456 18 Intlekofer, A. M. and Finley, L. W. S. (2019) Metabolic signatures of cancer cells and stem  
457 cells. *Nat. Metab.* **1**, 177–188.
- 458 19 Ben-Porath, I. et al. (2008) An embryonic stem cell-like gene expression signature in  
459 poorly differentiated aggressive human tumors. *Nat. Genet.* **40**, 499–507.
- 460 20 Palmer, N. P. et al. (2012) A gene expression profile of stem cell pluripotentiality and  
461 differentiation is conserved across diverse solid and hematopoietic cancers. *Genome Biol.*  
462 **13**.
- 463 21 Malta, T. M. et al. (2018) Machine Learning Identifies Stemness Features Associated with  
464 Oncogenic Dedifferentiation. *Cell* **173**, 338–354.e15.
- 465 22 Miranda, A. et al. (2019) Cancer stemness, intratumoral heterogeneity, and immune  
466 response across cancers. *Proc. Natl. Acad. Sci. U. S. A.* **116**, 9020–9029.
- 467 23 Schubert, M. et al. (2018) Perturbation-response genes reveal signaling footprints in  
468 cancer gene expression. *Nat. Commun.* **9**.
- 469 24 Liberzon, A. et al. (2015) The Molecular Signatures Database Hallmark Gene Set  
470 Collection. *Cell Syst.* **1**, 417–425.
- 471 25 Szalai, B. and Saez-Rodriguez, J. (2020) Why do pathway methods work better than they  
472 should? *FEBS Lett.* **594**, 4189–4200.

- 473 26 Subramanian, A. et al. (2017) A Next Generation Connectivity Map: L1000 Platform and  
474 the First 1,000,000 Profiles. *Cell* **171**, 1437-1452.e17.
- 475 27 Lamb, J. et al. (2006) The Connectivity Map: using gene-expression signatures to connect  
476 small molecules, genes, and disease. *Science*. **313**, 1929–35.
- 477 28 Müller, F. J. et al. (2008) Regulatory networks define phenotypic classes of human stem  
478 cell lines. *Nature* **455**, 401–405.
- 479 29 Hänzelmann, S. et al. (2013) GSVA: Gene set variation analysis for microarray and RNA-  
480 Seq data. *BMC Bioinformatics* **14**.
- 481 30 López-Knowles, E. et al. (2010) PI3K pathway activation in breast cancer is associated  
482 with the basal-like phenotype and cancer-specific mortality. *Int. J. Cancer* **126**, 1121–  
483 1131.
- 484 31 Creighton, C. J. et al. (2010) Proteomic and transcriptomic profiling reveals a link between  
485 the PI3K pathway and lower estrogen-receptor (ER) levels and activity in ER+ breast  
486 cancer. *Breast Cancer Res.* **12**.
- 487 32 Koboldt, D. C. et al. (2012) Comprehensive molecular portraits of human breast tumours.  
488 *Nature* **490**, 61–70.
- 489 33 Stemke-Hale, K. et al. (2008) An integrative genomic and proteomic analysis of PIK3CA,  
490 PTEN, and AKT mutations in breast cancer. *Cancer Res.* **68**, 6084–6091.
- 491 34 Pérez-Tenorio, G. et al. (2007) PIK3CA mutations and PTEN loss correlate with similar  
492 prognostic factors and are not mutually exclusive in breast cancer. *Clin. Cancer Res.* **13**,  
493 3577–3584.
- 494 35 Loi, S. et al. (2010) PIK3CA mutations associated with gene signature of low mTORC1  
495 signaling and better outcomes in estrogen receptor – positive breast cancer. *Proc. Natl.*  
496 *Acad. Sci. U. S. A.* **107**, 10208–10213.
- 497 36 Dogruluk, T. et al. (2015) Identification of Variant-Specific Functions of PIK3CA by Rapid  
498 Phenotyping of Rare Mutations. *Cancer Res.* **75**, 5341–54.
- 499 37 Zhang, Y. et al. (2017) A Pan-Cancer Proteogenomic Atlas of PI3K/AKT/mTOR Pathway  
500 Alterations. *Cancer Cell* **31**, 820-832.e3.
- 501 38 Mirzaa, G. et al. (2016) PIK3CA-associated developmental disorders exhibit distinct  
502 classes of mutations with variable expression and tissue distribution. *JCI Insight* **1**, 1–18.
- 503 39 Kuentz, P. et al. (2017) Molecular diagnosis of PIK3CA-related overgrowth spectrum  
504 (PROS) in 162 patients and recommendations for genetic testing. *Genet. Med.* **19**, 989–  
505 997.
- 506 40 Madsen, R. R. et al. (2021) NODAL/TGFβ signalling mediates the self-sustained  
507 stemness induced by PIK3CA H1047R homozygosity in pluripotent stem cells. *Dis. Model.*  
508 *Mech. dmm.048298*.
- 509 41 Watters, J. W. and Huang, P. S. (2009) Can phenotypic pathway signatures improve the  
510 prediction of response to PI3K pathway inhibitors? *Drug Discov. Today Ther. Strateg.* **6**,  
511 57–62.
- 512 42 Sonnenblick, A. et al. (2019) pAKT pathway activation is associated with PIK3CA  
513 mutations and good prognosis in luminal breast cancer in contrast to p-mTOR pathway  
514 activation. *Breast Cancer* **5**, 1–9.
- 515 43 Creighton, C. J. (2007) A gene transcription signature of the Akt/mTOR pathway in clinical  
516 breast tumors. *Oncogene* **26**, 4648–4655.
- 517 44 Liu, H. et al. (2020) The INPP4B Tumor Suppressor Modulates EGFR Trafficking and  
518 Promotes Triple Negative Breast Cancer. *Cancer Discov.* CD-19-1262.
- 519 45 Fagnocchi, L. and Zippo, A. (2017) Multiple Roles of MYC in Integrating Regulatory  
520 Networks of Pluripotent Stem Cells. *Front. Cell Dev. Biol.* **5**, 1–19.
- 521 46 Kim, J. et al. (2010) A Myc Network Accounts for Similarities between Embryonic Stem  
522 and Cancer Cell Transcription Programs. *Cell* **143**, 313–324.
- 523 47 Bell, C. M. et al. (2019) PIK3CA Cooperates with KRAS to Promote MYC Activity and  
524 Tumorigenesis via the Bromodomain Protein BRD9. *Cancers (Basel)*. **11**, 1634.
- 525 48 R Core Team. (2019) R: A language and environment for statistical computing. *R Found.*  
526 *Stat. Comput.*
- 527 49 Morgan, M. (2019) BiocManager: Access the Bioconductor Project Package Repository.

528 50 Wickham, H. (2016) ggplot2: Elegant Graphics for Data Analysis.  
529 51 Curtis, C. et al. (2012) The genomic and transcriptomic architecture of 2,000 breast  
530 tumours reveals novel subgroups. *Nature* **486**, 346–352.  
531 52 Rueda, O. M. et al. (2019) Dynamics of breast-cancer relapse reveal late-recurring ER-  
532 positive genomic subgroups. *Nature* **567**, 399–404.  
533 53 Cerami, E. et al. (2012) The cBio Cancer Genomics Portal: An open platform for exploring  
534 multidimensional cancer genomics data. *Cancer Discov.* **2**, 401–404.  
535 54 Colaprico, A. et al. (2016) TCGAbiolinks: An R/Bioconductor package for integrative  
536 analysis of TCGA data. *Nucleic Acids Res.* **44**, e71.  
537 55 Robinson, M. D. and Oshlack, A. (2010) A scaling normalization method for differential  
538 expression analysis of RNA-seq data. *Genome Biol.* **11**, R25.  
539 56 Dolgalev, I. (2020) msigdb: MSigDB Gene Sets for Multiple Organisms in a Tidy Data  
540 Format.  
541 57 Korotkevich, G. et al. (2016) Fast gene set enrichment analysis. *bioRxiv* 1–29.  
542 58 Schmidt, A. F. and Finan, C. (2018) Linear regression and the normality assumption. *J.*  
543 *Clin. Epidemiol.* **98**, 146–151.  
544

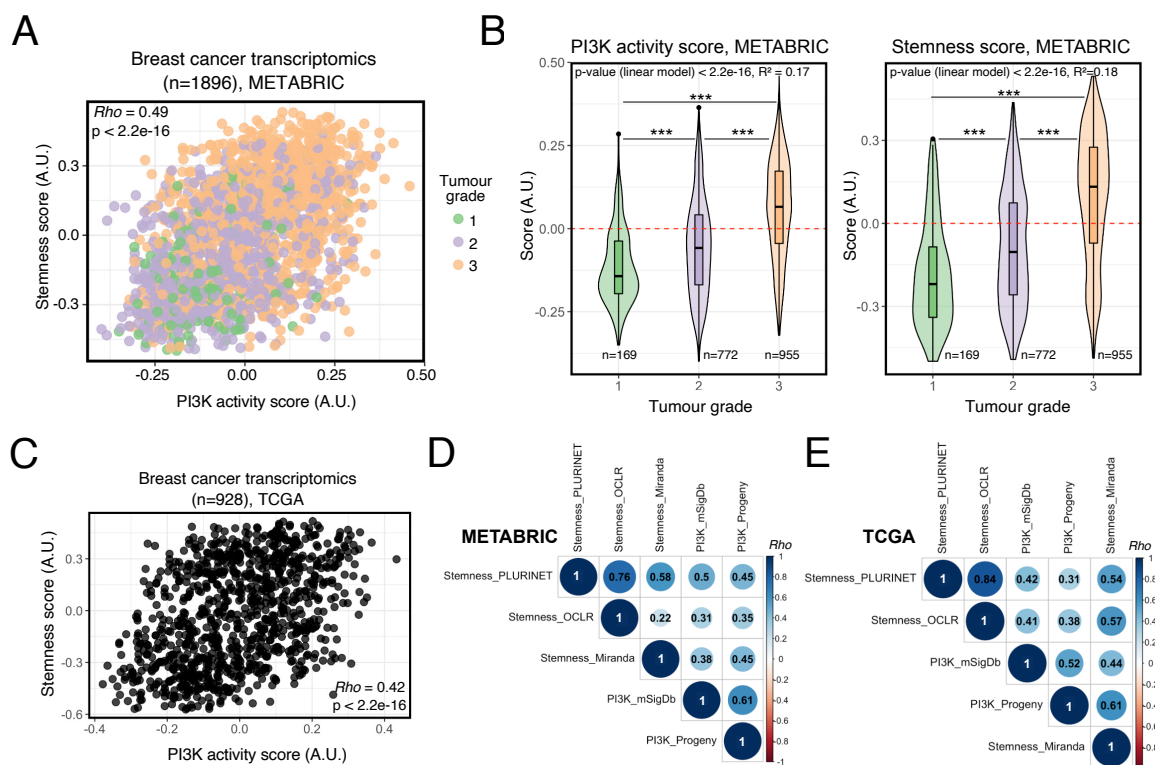

545  
546  
547  
548  
549  
550  
551  
552  
553  
554  
555  
556  
557  
558  
559  
560  
561  
562  
563  
564

**Fig. 1. Strong positive association between transcriptionally-inferred PI3K pathway activation and breast tumour stemness/grade.** (A) Rank-based (Spearman's  $Rho$ ) correlation analysis of the relationship between transcriptionally-inferred PI3K activity and stemness scores, evaluated across METABRIC breast cancer transcriptomes. Scores were determined using Gene Set Variation Analysis (GSVA) with mSigDb "HALLMARK\_PI3K\_AKT\_MTOR\_SIGNALING" (for PI3K activity score) and "MUELLER\_PLURINET" (for stemness score) gene signatures [24,28,29]. Gene lists used are included in Supplementary Tables 1 and 2. (B) PI3K activity and stemness score distributions across breast cancer grade (METABRIC). \*\*\*  $p \leq 0.001$  according to one-way ANOVA with Tukey's Honest Significant Differences method. The global  $p$ -value for each linear model is indicated within each plot. (C) As in (A) but based on TCGA breast invasive carcinoma (BRCA) transcriptomic data. (D) Rank-based correlation analyses of the stemness (PluriNet-based) and PI3K (mSigDb-based) scores used in the current study against published and independently-derived transcriptional indices for stemness and PI3K signalling, across METABRIC breast cancer transcriptomic data. Individual  $Rho$  coefficients are shown within the respective circles whose sizes are matched accordingly. Only significant correlations are shown (family-wise error rate  $< 0.05$ ). (E) As in (D) but based on TCGA BRCA transcriptomic data. The Stemness\_OCLR score is based on a machine-learning-derived stemness signature [21]; the Stemness\_Miranda score is based on a modification of the stemness signature of Palmer et al. [20,22]. The PI3K\_Progeny score is based on the analysis of benchmarked pathway-responsive genes as described in Ref. [23].

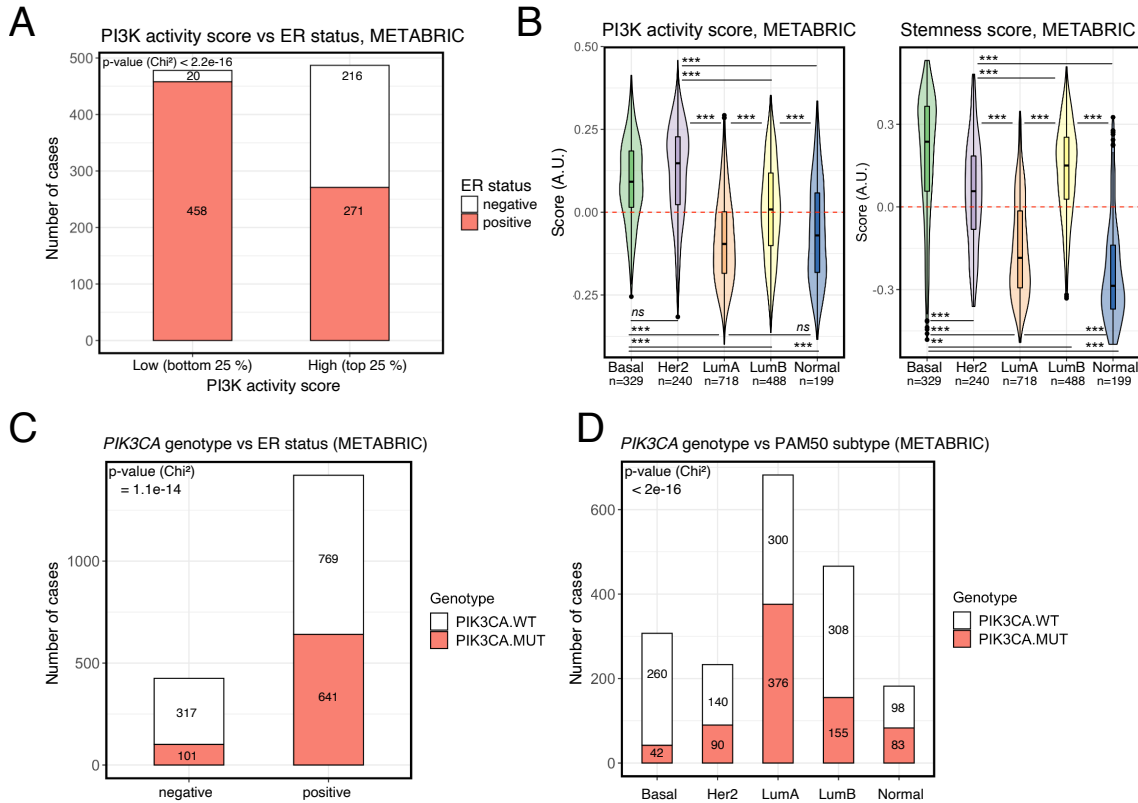

565  
566  
567  
568  
569  
570  
571  
572  
573

**Fig. 2. High PI3K activity and stemness scores, but not *PIK3CA* mutations, are enriched in aggressive breast cancer subtypes.** (A) PI3K activity score distribution in METABRIC breast tumours stratified according to ER status. (B) PI3K activity and stemness score distributions across METABRIC breast cancers stratified according to PAM50 subtype; \*\*  $p \leq 0.01$ , \*\*\*  $p \leq 0.001$  according to Tukey's Honest Significant Differences method; *ns*: non-significant. (C) and (D) The distribution of *PIK3CA* wild-type (*PIK3CA.WT*) and mutant (*PIK3CA.MUT*) samples in METABRIC breast cancers, stratified according to ER status (C) or PAM50 subtype (D).

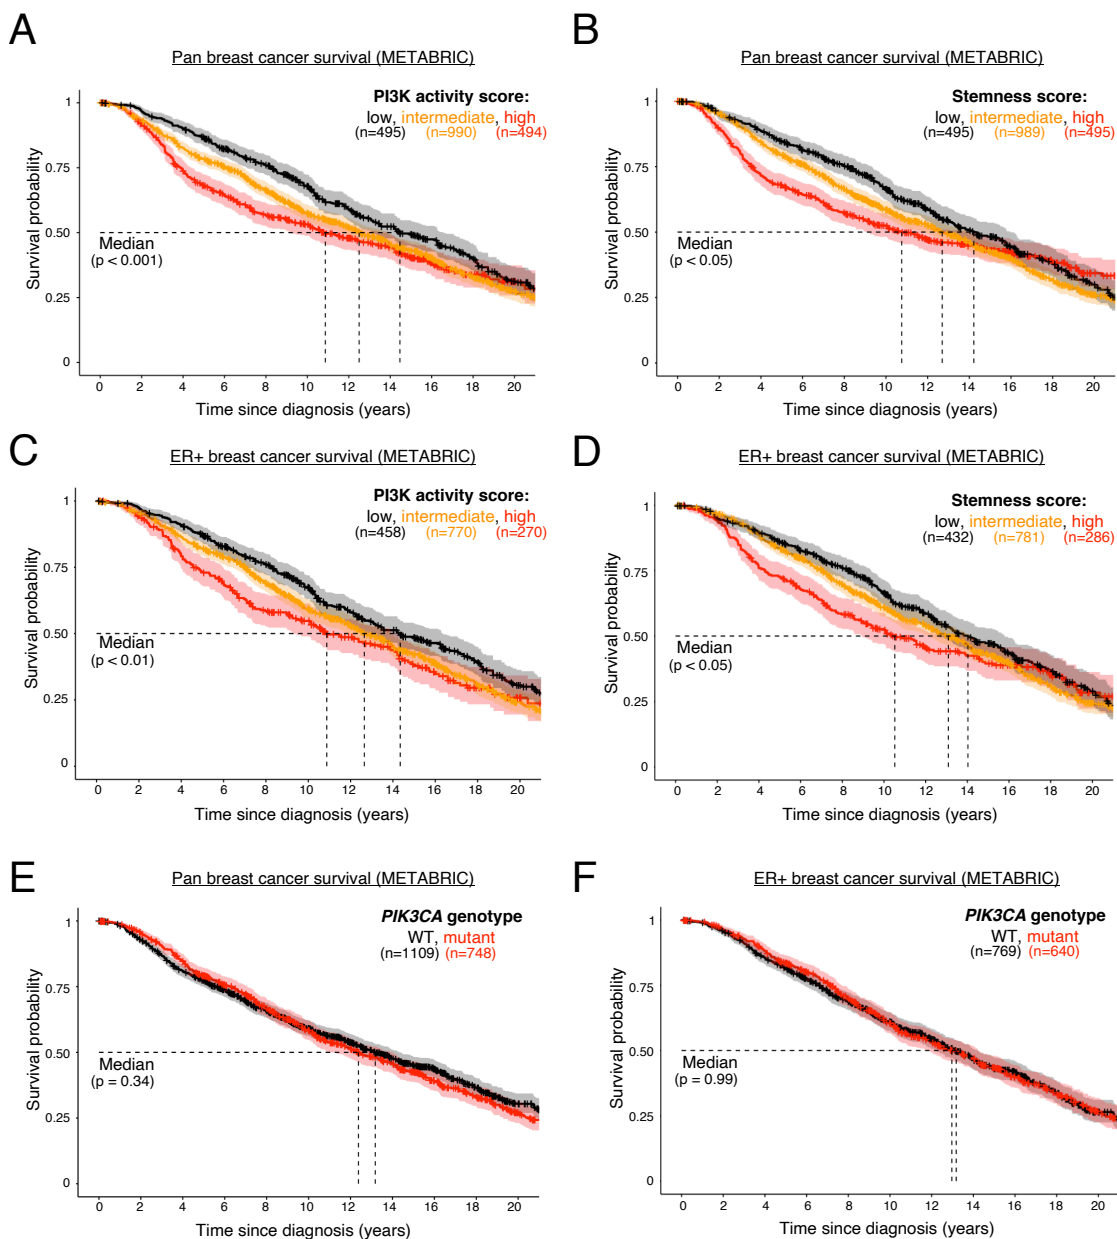

574  
 575  
 576  
 577  
 578  
 579  
 580  
 581  
 582  
 583  
 584

**Fig. 3. PI3K activity and stemness scores, but not *PIK3CA* genotype, are prognostic in ER+ breast cancer.** Pan-breast cancer patient survival in METABRIC, as a function of PI3K activity (A) or stemness (B) score. Survival analysis in estrogen receptor (ER)-positive breast cancer patients, as a function of PI3K activity (C) or stemness (D) score. Low, intermediate and high classifications represent the bottom quartile, the interquartile range and the top quartile of the respective scores. (E) and (F) represent pan- and ER-positive breast cancer patient (METABRIC) survival, respectively, as a function of binary *PIK3CA* genotype. The mutant genotype captures only cases with activating missense mutations. The sample size for each panel and subgroup is indicated, and p-values were calculated using a log-rank test. The 95% confidence intervals are indicated by shading.

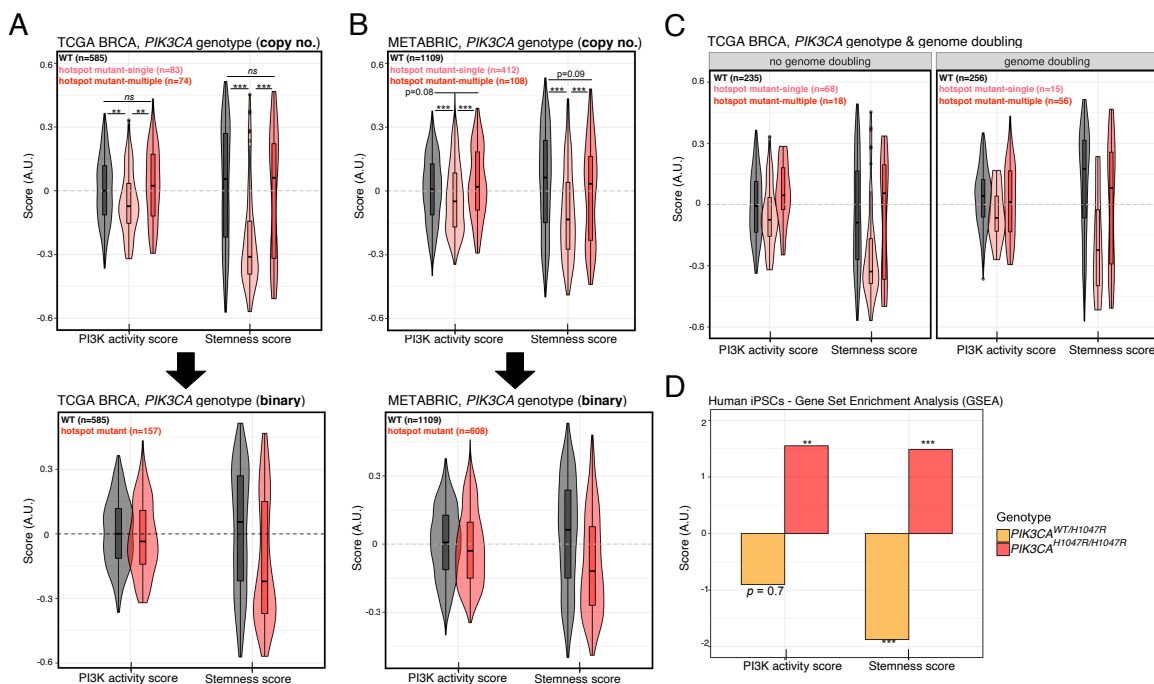

585  
586  
587

**Fig. 4. The presence of a single-copy, but not multi-copy, hotspot *PIK3CA* mutation is associated with lower PI3K activity and stemness score.** (A) PI3K activity and stemness score distributions across TCGA breast cancers following stratification according to the presence or absence of single vs multiple copies of *PIK3CA* “hotspot” variants (C420R, E542K, E545K, H1047L, H1047R); \*\*  $p \leq 0.01$ , \*\*\*  $p \leq 0.001$  according to one-way ANOVA with Tukey’s Honest Significant Differences method. (B) As in (A) but performed using METABRIC breast cancer transcriptomic and genomic data. (C) As in (A) but further stratified according to available genome doubling information. (D) Complementary GSEA-based PI3K and stemness score calculations using publicly-available transcriptomic data from iPSCs with heterozygous or homozygous *PIK3CA*<sup>H1047R</sup> expression [40]; enrichments are calculated relative to isogenic wild-type controls. \*\*  $p \leq 0.01$ , \*\*\*  $p \leq 0.001$  for individual enrichments, according to FDR = 0.05 (Benjamini-Hochberg correction for multiple comparisons).



599

A

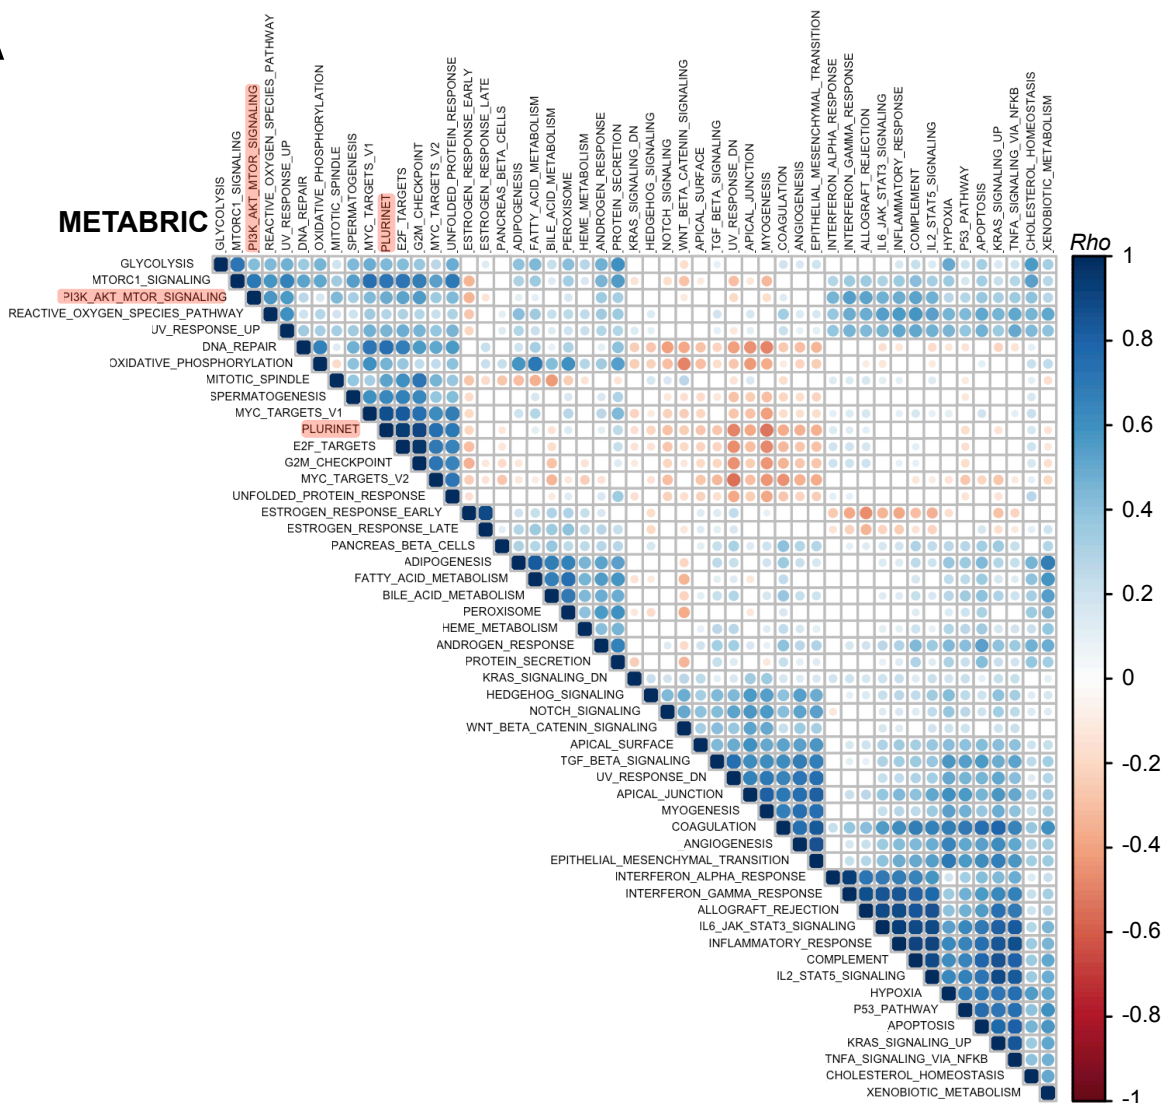

600

601

Continues on the next page

B

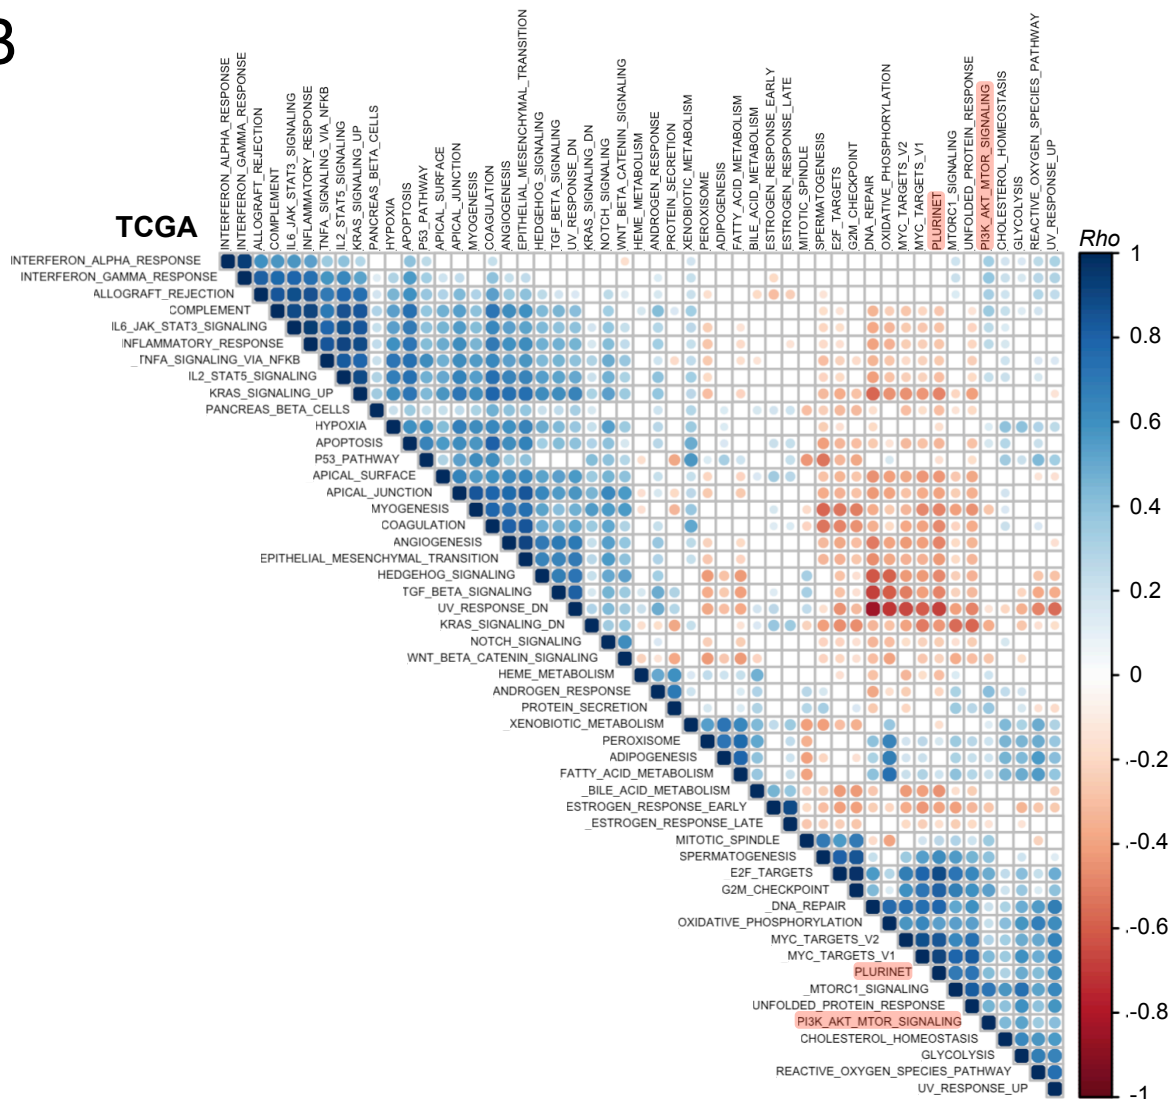

602

603

604

605

606

607

608

609

610

**Fig. 5. Breast cancer PI3K and stemness scores form a common cluster with proliferative and metabolic processes.** Rank-based correlation analyses across METABRIC (A) and TCGA (B) GSEA-derived gene set enrichment scores, evaluating all 50 mSigDb Hallmark Gene Sets and PluriNet. Individual *Rho* coefficients are shown within the respective circles whose sizes are matched accordingly. Only significant correlations are shown (family-wise error rate < 0.05). The clusters were generated using unsupervised hierarchical clustering. The positions of PluriNet (stemness) and PI3K\_AKT\_MTOR (PI3K activity) signatures are highlighted in red.

611 Supplementary Material for

612

613 **Transcriptomically-inferred PI3K activity and stemness show a counterintuitive**  
614 **correlation with *PIK3CA* genotype in breast cancer**  
615

616 Ralitsa R. Madsen<sup>1,\*</sup>, Oscar M. Rueda<sup>3,4,5</sup>, Xavier Robin<sup>6</sup>, Carlos Caldas<sup>3,4,5</sup>, Robert K. Semple<sup>2,a</sup>, Bart  
617 Vanhaesebroeck<sup>1,a,\*</sup>

618

619 <sup>1</sup>University College London Cancer Institute, Paul O’Gorman Building, University College London,  
620 London, UK

621 <sup>2</sup>Centre for Cardiovascular Science, Queen’s Medical Research Institute, University of Edinburgh,  
622 Edinburgh, UK

623 <sup>3</sup>Cancer Research UK Cambridge Institute and Department of Oncology, Li Ka Shing Centre, University  
624 of Cambridge, Cambridge, UK

625 <sup>4</sup>Cambridge Breast Unit, Addenbrooke’s Hospital, Cambridge University Hospital NHS Foundation  
626 Trust, Cambridge, UK

627 <sup>5</sup>NIHR Cambridge Biomedical Research Centre and Cambridge Experimental Cancer Medicine Centre,  
628 Cambridge University Hospital NHS Foundation Trust, Cambridge, UK

629 <sup>6</sup>SIB Swiss Institute of Bioinformatics, Biozentrum, University of Basel, Klingelbergstrasse 50–70, CH-  
630 4056 Basel, Switzerland

631

632 **Other supplementary materials for this manuscript include the following:**

633

634 Separate source code file for analysis of METABRIC/TCGA PI3K activity and stemness  
635 scores (<https://osf.io/g8rf3/wiki/home/> & doi: 10.17605/OSF.IO/G8RF3)

636 Supplementary Table 1: mSigDb “HALLMARK\_PI3K\_AKT\_MTOR\_SIGNALING” gene list

637 Supplementary Table 2: mSigDb “MUELLER\_PLURINET” gene list

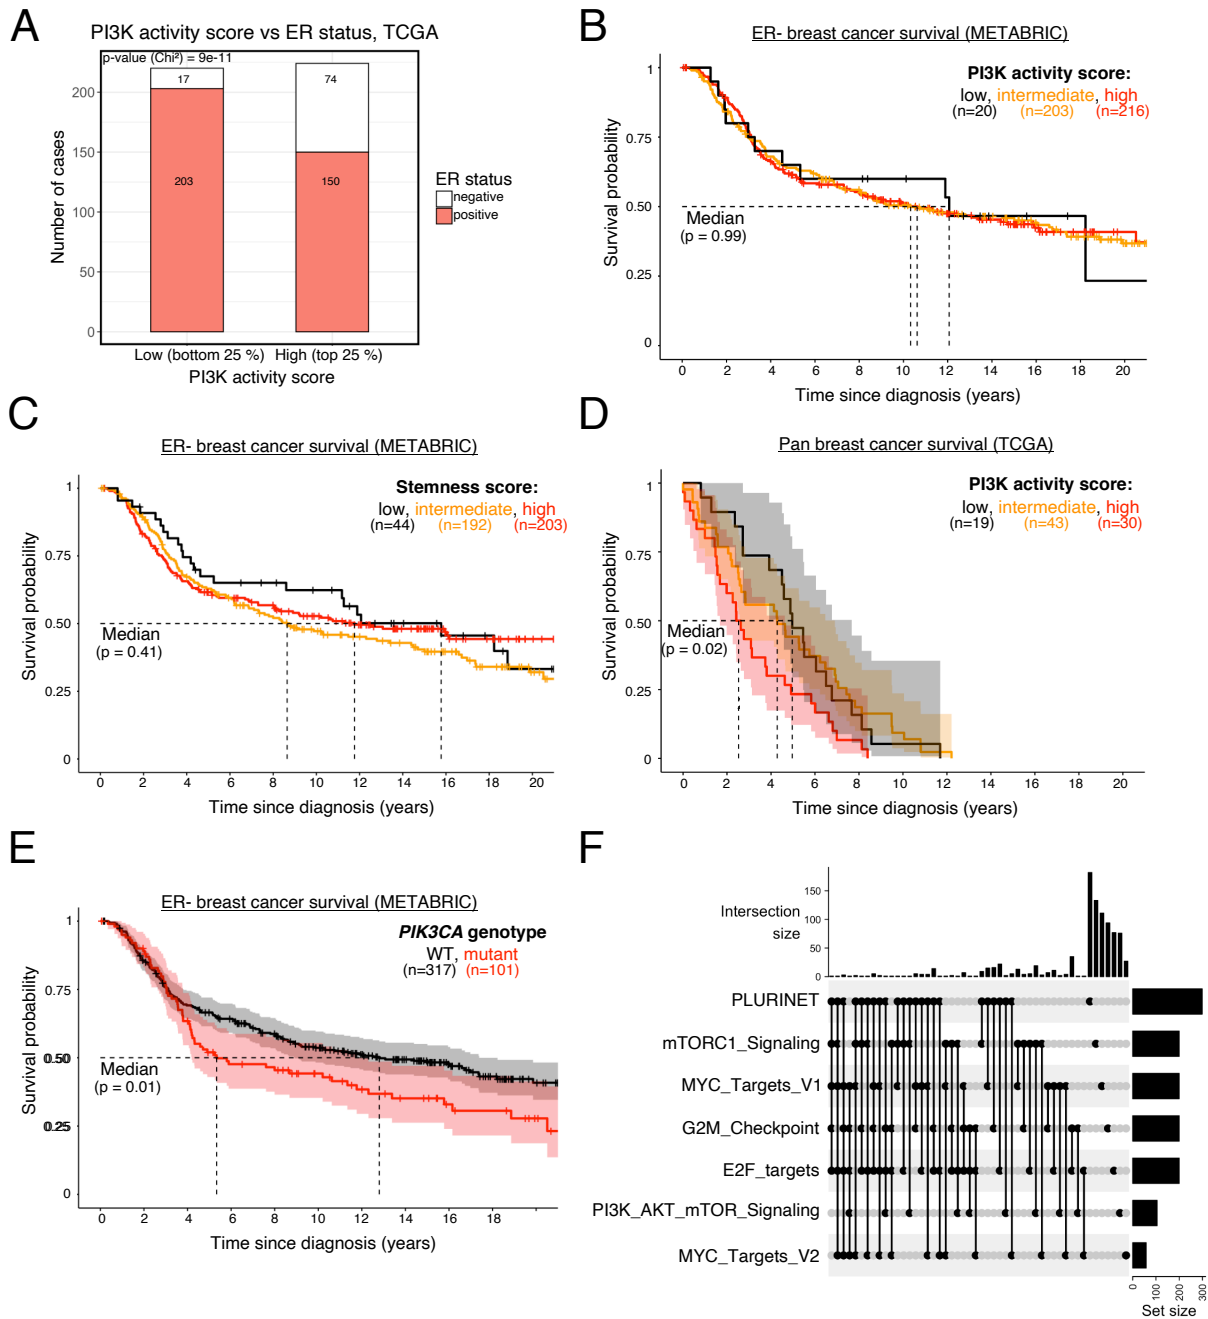

638

639 **Fig. S1. (A)** PI3K activity score distribution in TCGA breast tumours stratified according to ER status. Survival  
 640 analysis in estrogen receptor (ER)-negative breast cancer patients, as a function of PI3K activity **(B)** or stemness  
 641 **(C)** score. **(D)** Pan-breast cancer patient survival in TCGA, as a function of PI3K activity score. **(E)** ER-negative  
 642 breast cancer patient (METABRIC) survival as a function of binary *PIK3CA* genotype. The sample size for each  
 643 panel and subgroup is indicated, and p-values were calculated using a log-rank test; where shown, the 95%  
 644 confidence intervals are indicated by shading. **(F)** UpSet plot showing intersection set sizes across the specified  
 645 gene set combinations.
